# Supplementary material
Source: PubMed Central journal article supplement (PMC3090011)

## **Supplementary information**

### **Material and Methods**

#### **Plasmids**

H.s. UbcH10, X.l. UbcX and X.l. Cdc20 were amplified from cDNA libraries. Catalytically inactive UbcH10<sup>ci</sup> and UbcX<sup>ci</sup> were generated by mutating cysteine 114 of UbcH10<sup>wt</sup> and cysteine 114 of UbcX<sup>wt</sup> respectively, to serine. Securin constructs were as described (Schmidt et al, 2005). 6xhis-Ubiquitin and 6xhis-Ubiquitin<sup>GG</sup> constructs were a generous gift of M. Scheffner.

#### **Proteins and Antibodies**

6xhis-tagged UbcX, UbcH10 and ubiquitin were purified from BL21pRIL bacteria and 10xhis-2xTEV-Cdc20 from SF9 cells by Ni<sup>2+</sup>-NTA agarose chromatography. UbcX and UbcH10 proteins were dialysed into buffer containing 20mM K-HEPES pH 7.7, 150mM KCl, 10% Glycerol and 1mM DTT. Human E1 enzyme was purchased from Boston Biochem.

Antibodies against Cdc20 and CyclinB2 were purchased from Abcam, against Cdc27 and  $\alpha$ -tubulin from Sigma. Antibodies against  $\beta$ TRCP were a kind gift of T. Lorca. Anti-XErp1 antibodies were described previously (Schmidt et al, 2005). Anti-UbcX antibodies were generated by immunizing rabbits with full-length 6xhis-UbcX and affinity purification of the anti-UbcX antibodies from the obtained serum. Anti-USP44 antibodies were generated by immunizing one rabbit with 6xhis-USP44 aa 1-200 and two rabbits with a mix of USP44-232 peptide (KMNQKNSPTTKQKTPAPTSDKAC) and USP44-CT peptide (C-ENGHLSDTLPLVHGSPQSPPR). Antibodies were affinity purified using 6xhis-USP441-200, USP44-232 peptide or USP44-CT peptide.

#### ***Xenopus* extracts**

*Xenopus* CSF egg extracts were prepared and DNA morphology was examined as described (Murray, 1991). Incubations were done at 20°C. When indicated, CaCl<sub>2</sub> was added to 600 $\mu$ M, cycloheximide to 350 $\mu$ M, MG262 to 100 $\mu$ M, and nocodazole to 33 $\mu$ M. “High sperm” and “low sperm” extract contained 11,5x10<sup>6</sup> and 1x10<sup>6</sup>, respectively, sperm nuclei per ml extract. In general, 6xhis-UbcH10<sup>wt</sup>, 6xhis-UbcH10<sup>ci</sup> were added to a final concentration of 12 $\mu$ M, 6xhis-UbcX<sup>wt</sup> or 6xhis-UbcX<sup>ci</sup> to 6 $\mu$ M (unless explicitly mentioned) and a corresponding volume of dialysis

buffer was used as buffer control. To dephosphorylate extract proteins, samples were diluted with 9 volumes of 1x CIP-buffer (NEB) containing 10 units CIP (NEB) and incubated for 30 min at 25°C. For glycerol-gradient centrifugation, extracts were cleared by centrifugation at 186,000 g and resolved on 10–40% glycerol gradient by centrifugation at 150,000 g. 0.5-ml fractions were collected and analyzed by SDS-PAGE and immunoblotting.

### ***Xenopus* oocyte injections**

Oocytes were obtained, cultured and injected as described previously (Ohe et al. 2006). Briefly, *Xenopus* stage VI oocytes were injected with 10nL of a 8mg/mL UbcX protein solution or buffer and maturation was induced with progesterone (5 µg/ml; SIGMA) for 1 h. Oocytes undergoing GVBD in a time window of 15 min were pooled and at the indicated timepoints after GVBD collected and snap frozen in liquid N<sub>2</sub>. Oocytes were homogenized in 1x CIP-buffer (NEB) containing complete protease inhibitors (Roche) and incubated with 10 units CIP (NEB) for 30' at 20°C. An equal volume of 3x laemmli buffer was added and the samples were analyzed by WB.

### **Immunodepletion, immunoprecipitation**

Immunodepletion experiments were performed as described (Schmidt et al, 2005). To quantify immunoprecipitated Cdc27 and XErp1, immunoblots were visualized with ECL reagent. Signal intensities were quantified using Image J software. Anti-Cdc27 immunoprecipitates were used as loading controls and the relative amounts of copurified XErp1 were calculated. To XErp1 and Cdc20 immunoprecipitation assays (Fig.5), 125 µM N-ethylmaleimide was added. For the purification of his-tagged ubiquitin conjugates a protocol described in (Glockzin et al, 2003) was modified with the help of Alejandro Rojas. Briefly, to CSF extract 12,5 µM 6xhis-Ubiquitin or 6xhis-Ubiquitin<sup>GG</sup> was added and incubated with 6xhis-UbcX<sup>wt</sup>, 6xhis-UbcX<sup>ci</sup> or buffer at 20°C for 30'. The extract was denatured at 4°C by adding 9 volumes of denaturation buffer (6M guanidinium-HCl, 100 mM Na<sub>2</sub>HPO<sub>4</sub>/NaH<sub>2</sub>PO<sub>4</sub> pH 8.0, 10 mM imidazole, 10 mM β-mercaptoethanol and complete protease inhibitors (Roche)), cleared by centrifugation and incubated with Ni<sup>2+</sup>-NTA beads (Quiagen). The beads were washed, the bound proteins were re-natured, eluted into 3x laemmli buffer containing 200mM Imidazole and analyzed by Western blotting

### **In vitro ubiquitylation assays**

APC/C was immunoprecipitated from 2 ml CSF extract using 25 µg Cdc27 antibodies immobilized on protein G dynabeads (Invitrogen). Assays were done as described previously (Schmidt et al. 2005), except that 27µM 6xhis-UbcX was used and no exogenous Cdc20 or XErp1 was added: The beads were washed once in QA and twice in CSF-XB and equally divided into 10 reaction tubes. A mix containing E1, Ubiquitin and an energy regeneration system in CSF-XB buffer was added and the reaction was started by the addition of 6xhis-UbcX. For Cdc20 ubiquitylation assays, an equal volume of 3x laemmli buffer was added to the reaction at the indicated timepoints. To assay XErp1 ubiquitylation and release from the APC/C, the beads were separated from the supernatant on a magnet and the supernatant was added to an equal amount of 3x laemmli buffer. Samples were directly processed and analyzed by WB.

### **Legend to Supplementary Figure 1**

**Fig S1 (A)** UbcH10 overrides CSF-arrest in *Xenopus* egg extract. To CSF-extract the indicated reagents were added and the stabilities of <sup>35</sup>S-securin, XErp1, and cyclinB2 were analyzed by WB. **(B)** UbcX accumulates during oocyte maturation. Stage VI oocytes were obtained and maturation was induced by progesterone treatment. At the indicated time points after GVBD samples were taken for WB analysis. **(C)** UbcX<sup>wt</sup>-induced CSF-release requires APC/C<sup>Cdc20</sup> activity. Cdc20 was depleted from CSF-extracts in three rounds of immunodepletion and recombinant Cdc20 was added to a final concentration of 170nM as indicated. Cdc20 was detected by WB in the input, in the control, in the extract after the third round of Cdc20-depletion ( $\Delta$ Cdc20) as well as in the depletion/add-back sample. Note that recombinant Cdc20 is 8 kDa bigger than endogenous due to the 10xhis-2xTEV-tag for purification. **(D)** Cdc20-depleted or Cdc20 depletion/add-back extract was supplemented with calcium, buffer or UbcX<sup>wt</sup> and the stability of <sup>35</sup>S-securin was analyzed by autoradiography. **(E)** Cdc20 ubiquitylation. CSF-extract containing his-Ub<sup>wt</sup> or his-Ub<sup>ΔGG</sup> were incubated with buffer, UbcX<sup>wt</sup> or UbcX<sup>ci</sup> for 30 min and processed for WB (input) or his-ubiquitin modified proteins were purified with Ni<sup>2+</sup>NTA beads under denaturing conditions (his-Pulldown). Cdc20 was detected by WB.

Supplementary Figure 1

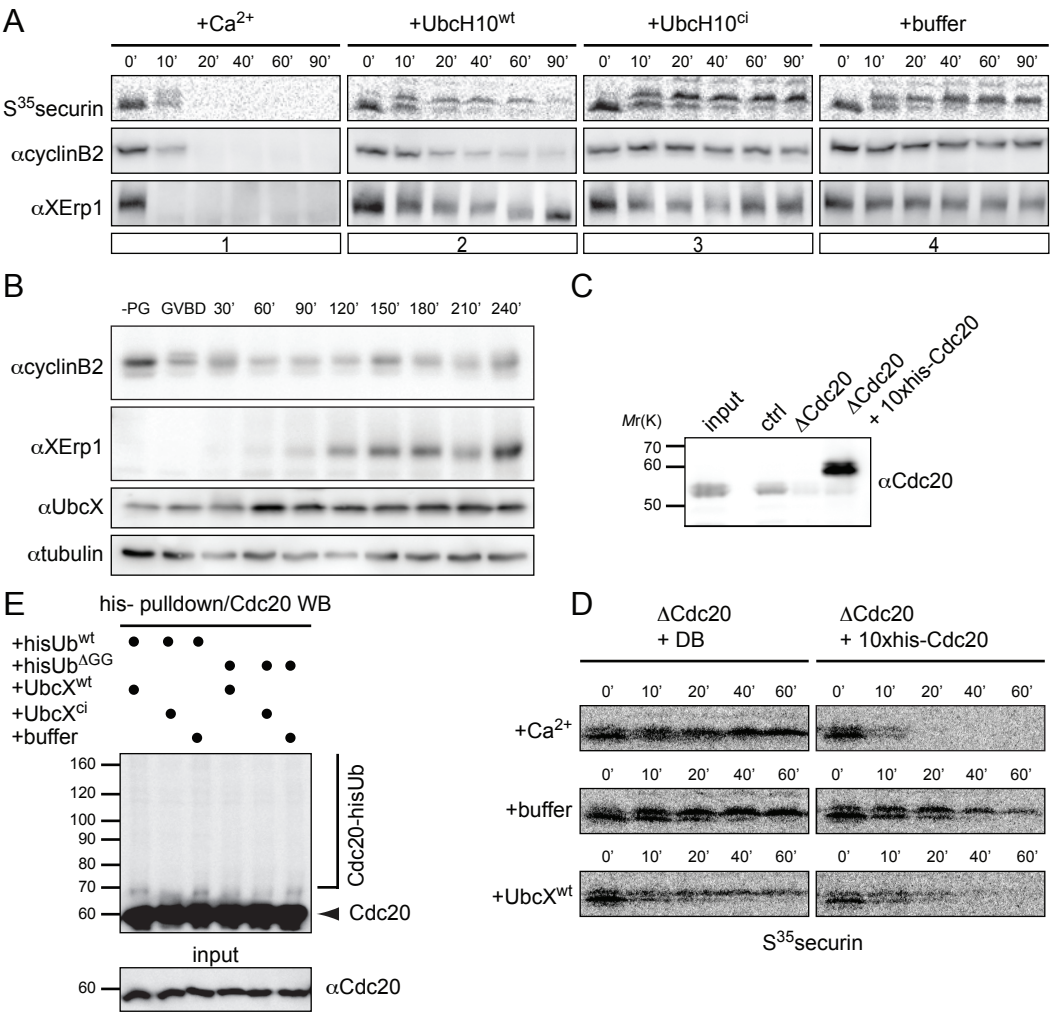

Supplement: embor201132s1.pdf [file embor201132s1.pdf]
